# Supplementary material for: Nanoporous NiAl-LDH nanosheet arrays with optimized Ni active sites for efficient electrocatalytic alkaline water splitting
Source: Royal Society of Chemistry journal article supplement (doi:10.1039/d0se00050g), 2020-01-01
Supplement: d0se00050g1.pdf [file d0se00050g1.pdf]

Supporting Information (SI):

## **Nanoporous NiAl-LDH nanosheet arrays with optimized Ni active sites for efficient electrocatalytic alkaline water splitting**

Liangliang Feng,<sup>\*ab</sup> Yingying Du,<sup>a</sup> Jianfeng Huang,<sup>\*a</sup> Liyun Cao,<sup>a</sup> Li Feng,<sup>a</sup> Yongqiang Feng,<sup>a</sup> Qianqian Liu,<sup>a</sup> Dan Yang<sup>a</sup> and Koji Kajiyoshi<sup>\*b</sup>

*<sup>a</sup> School of Materials Science & Engineering, Xi'an Key Laboratory of Green Processing for Ceramic materials, Shaanxi Key Laboratory of Green Preparation and Functionalization for Inorganic Materials, Shaanxi University of Science and Technology, Xi'an Shaanxi, 710021, P.R. China.*

*<sup>b</sup> Research Laboratory of Hydrothermal Chemistry, Faculty of Science and Technology, Kochi University, Kochi, 780-8520, Japan.*

E-mail: fengll@sust.edu.cn; huangjf@sust.edu.cn; kajiyosh@kochi-u.ac.jp

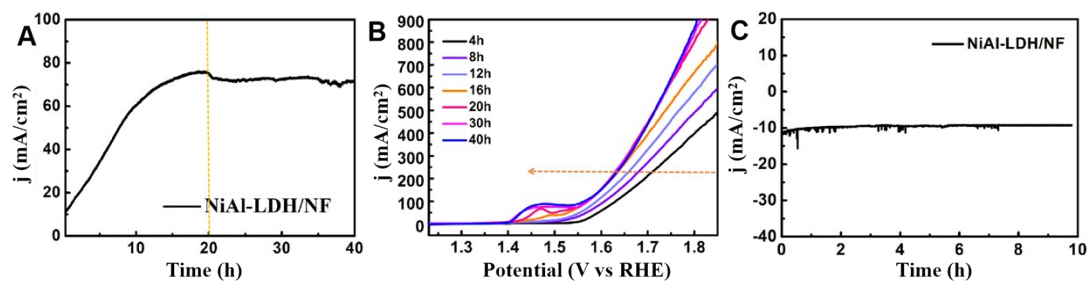

**Fig. S1** (A) Electrochemical etching process; (B) OER polarization curves and (C) the long-term HER durability test of NiAl-LDH/NF in alkaline media (1 M KOH solution).

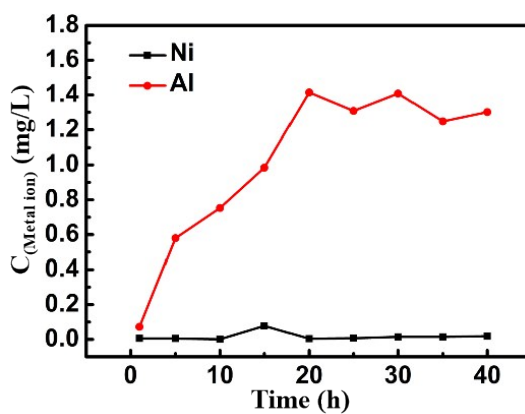

**Fig. S2** The contents of Ni and Al species in the electrolyte as a function of electrocatalysis time at an applied potential of 1.56 V.

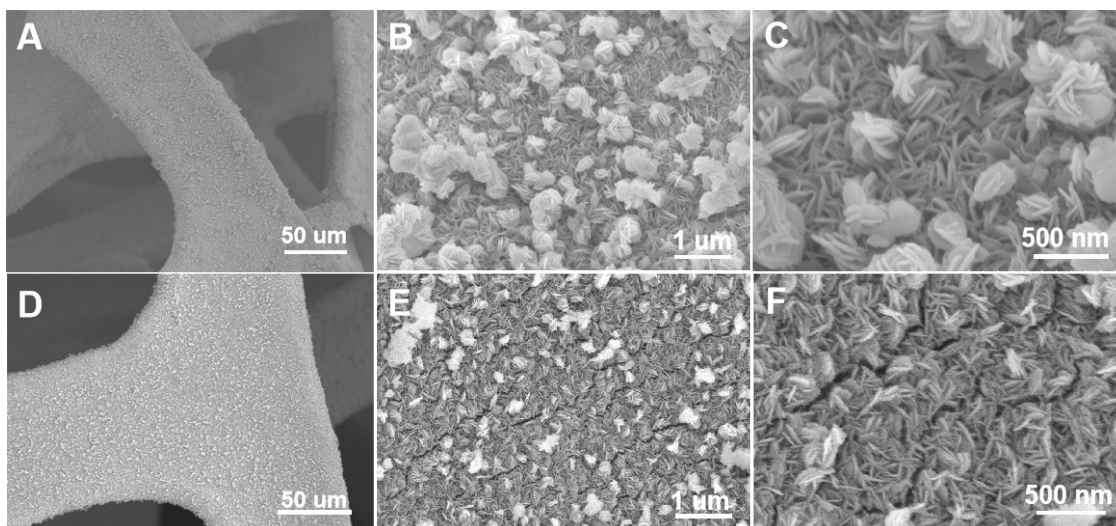

**Fig. S3** (A-C) SEM images of np-NiAl-LDH/NF; (D-F) SEM images of NiAl-LDH/NF.

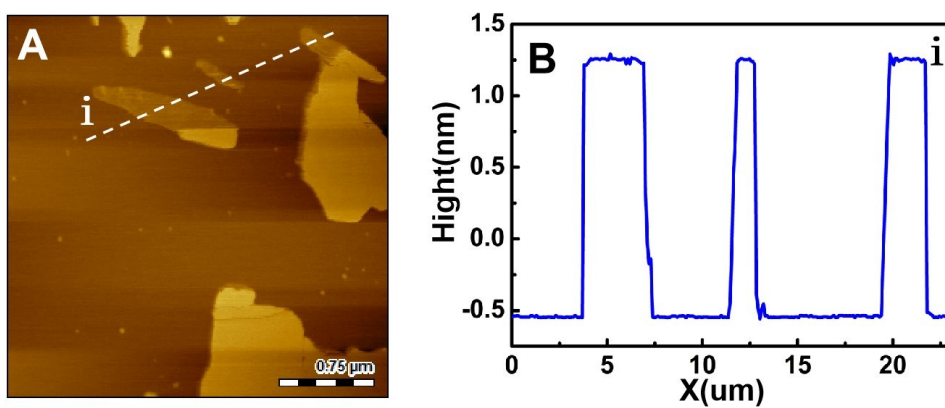

**Fig. S4** (A) AFM image and (B) the corresponding height profile of np-NiAl-LDH/NF.

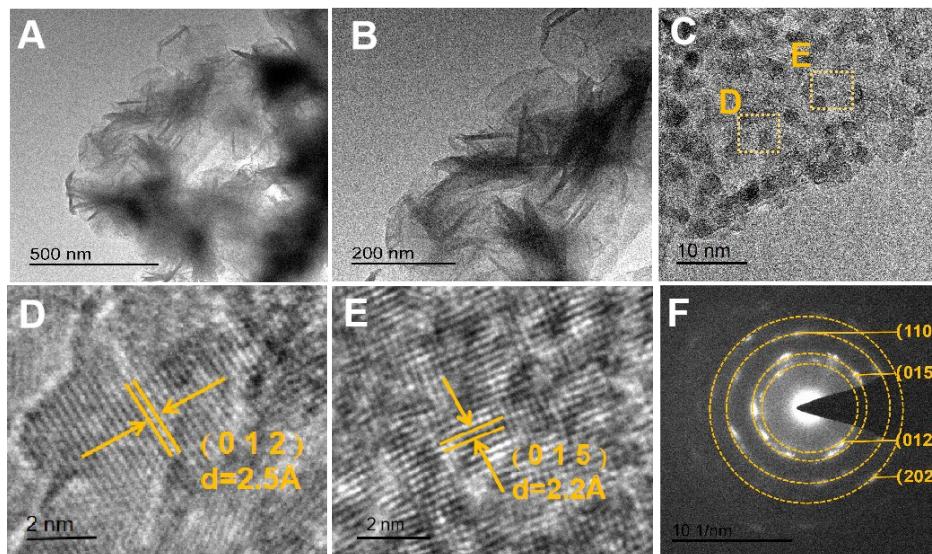

**Fig. S5** (A-C) TEM images; (D,E) HRTEM images; and (F) the corresponding SAED pattern of NiAl-LDH/NF.

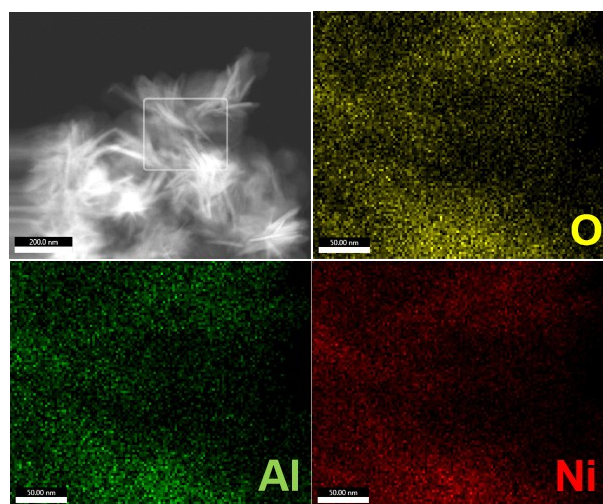

**Fig. S6** The elemental mapping images of NiAl-LDH/NF.

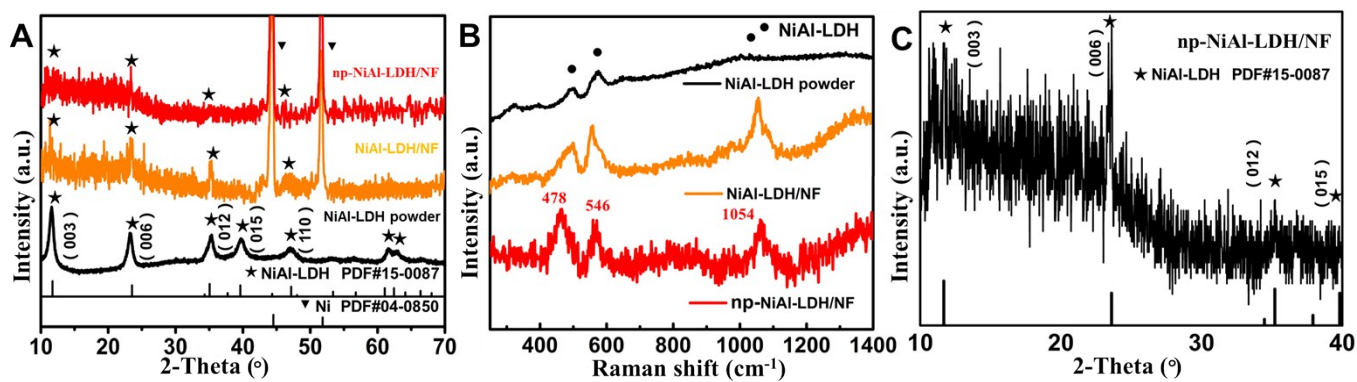

**Fig. S7** (A) XRD patterns; (B) Raman spectra of NiAl-LDH powder, NiAl-LDH/NF and np-NiAl-LDH/NF and (C) the partially enlarged XRD pattern of np-NiAl-LDH/NF.

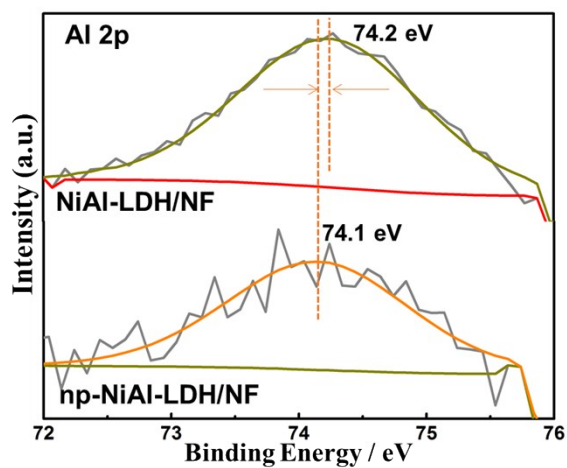

**Fig. S8** Al 2p XPS high-resolution spectra of NiAl-LDH/NF and np-NiAl-LDH/NF.



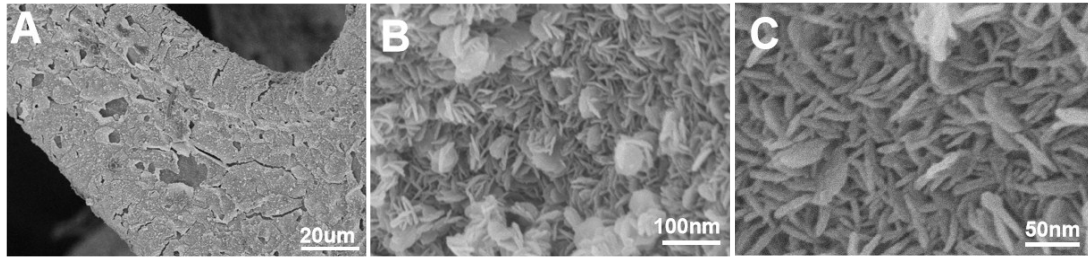

**Fig. S9** (A-C) SEM images of np-NiAl-LDH/NF after 100 h-electrocatalytic HER test.

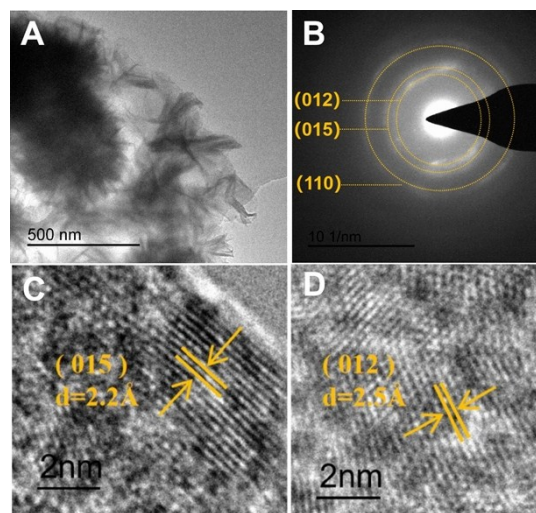

**Fig. S10** (A) TEM image; (B) SAED pattern; and (C-D) High-resolution TEM images of np-NiAl-LDH/NF after 100 h-long electrocatalysis for HER.

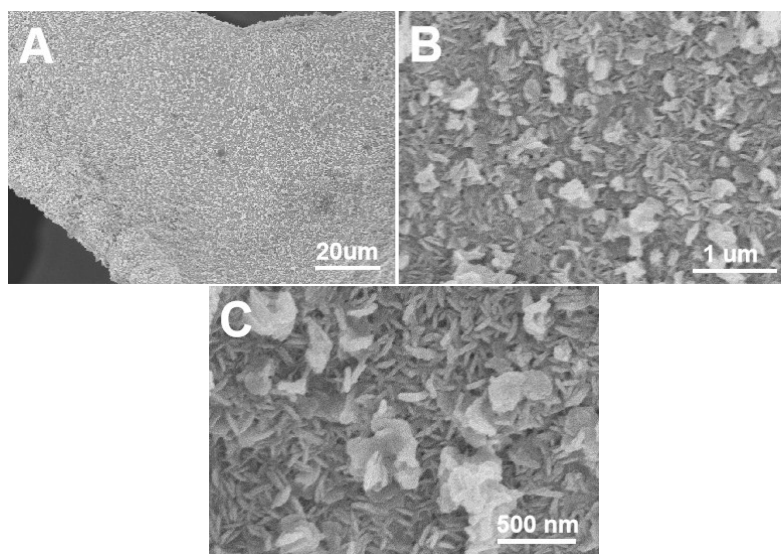

**Fig. S11** (A-C) SEM images of np-NiAl-LDH/NF after 100 h-electrocatalytic OER test.

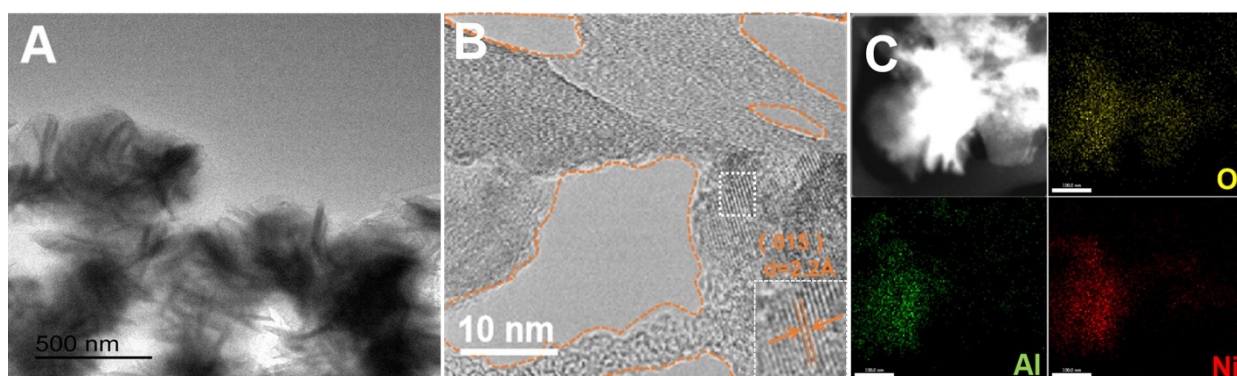

**Fig. S12** (A,B) TEM images and (C) the corresponding elemental mapping images of np-NiAl-LDH/NF after 100 h-long electrocatalysis for OER.

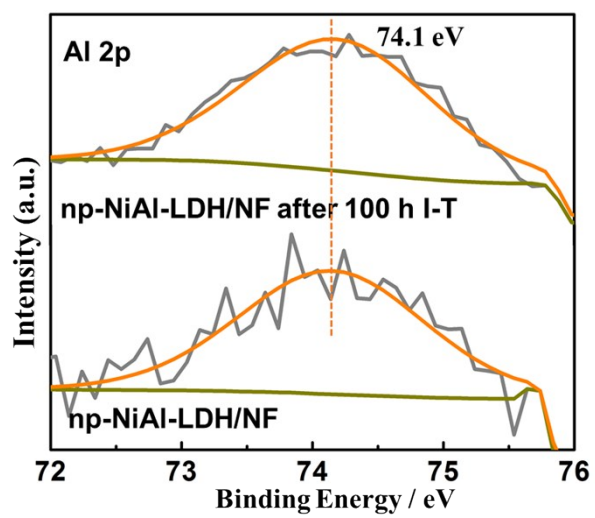

**Fig. S13** High-resolution Al spectra of np-NiAl-LDH/NF and np-NiAl-LDH/NF after long-term catalytic OER stability test for 100 h.



**Table S1.** The Ni and Al contents were obtained from the EDX results of NiAl-LDH/NF and np-NiAl-LDH/NF.

| <b>Atomic %</b> | <b>NiAl-LDH/NF</b> | <b>np-NiAl-LDH/NF</b> |
|-----------------|--------------------|-----------------------|
| <b>Ni</b>       | <b>43.28</b>       | <b>51.04</b>          |
| <b>Al</b>       | <b>18.11</b>       | <b>13.02</b>          |
| <b>Ni/Al</b>    | <b>2.39</b>        | <b>3.92</b>           |

**Table S2.** Comparison of the contents for four oxygen species from the fitting O 1s XPS spectra of NiAl-LDH/NF and np-NiAl-LDH/NF.

| <b>Oxygen species</b>                  | <b>NiAl-LDH/NF</b> | <b>np-NiAl-LDH/NF</b> |
|----------------------------------------|--------------------|-----------------------|
| <b>adsorbed water (H<sub>2</sub>O)</b> | <b>25.61%</b>      | <b>32.09%</b>         |
| <b>hydroxyl group (-OH)</b>            | <b>25.85%</b>      | <b>23.50%</b>         |
| <b>oxygen vacancy (V<sub>O</sub>)</b>  | <b>17.34%</b>      | <b>28.74%</b>         |
| <b>metal-oxygen (M-O)</b>              | <b>31.21%</b>      | <b>15.67%</b>         |

**Table S3.** Comparison of electrocatalytic performance of np-NiAl-LDH/NF with other recently reported Ni-based LDH catalysts for the HER in alkaline media.

| Catalyst                                                                  | Electrolyte | Overpotential at the corresponding $j$                    | Stability test (h) | Tafel slope | Reference                                       |
|---------------------------------------------------------------------------|-------------|-----------------------------------------------------------|--------------------|-------------|-------------------------------------------------|
| np-NiAl-LDH/NF                                                            | 1 M KOH     | ~90@10 mA/cm <sup>2</sup><br>~200@100 mA/cm <sup>2</sup>  | 40                 | 72          | This work                                       |
| NiAl-LDH/MoS <sub>2</sub>                                                 | 1 M KOH     | 220@10 mA/cm <sup>2</sup><br>~335@100 mA/cm <sup>2</sup>  | 10                 | 82          | ACS Energy Lett. 2018, 3, 952-960               |
| Ni@NiFe LDH                                                               | 1 M KOH     | 92@10 mA/cm <sup>2</sup><br>233@100 mA/cm <sup>2</sup>    | 24                 | 72.3        | J Mater Chem A. 2019, 7(38), 21722-21729        |
| CoFe@NiFe/NF                                                              | 1 M KOH     | 240@10 mA/cm <sup>2</sup>                                 | 30                 | 46          | Appl Catal B- Environ. 2019, 253, 131-139       |
| Fe-Ni LDH/NF                                                              | 1 M KOH     | 127@10 mA/cm <sup>2</sup><br>257@50 mA/cm <sup>2</sup>    | 14                 | 109.4       | ACS Sustain Chem Eng. 2019, 7(17), 15073-15079  |
| NiCo <sub>2</sub> O <sub>4</sub> @Ni <sub>x</sub> Co <sub>y</sub> -LDH/NF | 1 M KOH     | 193@10 mA/cm <sup>2</sup>                                 | 24                 | /           | ACS Sustain Chem Eng. 2019, 7(5), 4784-4791     |
| Ni <sub>1-x</sub> Fe <sub>x</sub> LDH/NF                                  | 1 M KOH     | 170@10 mA/cm <sup>2</sup><br>~260@50 mA/cm <sup>2</sup>   | 36                 | 83          | ACS Appl. Mater. Interfaces. 2018, 10(49), 2245 |
| Ni <sub>1</sub> Cr <sub>1</sub> LDH/NF                                    | 1 M KOH     | 83@10 mA/cm <sup>2</sup>                                  | 30                 | 61          | Nanoscale. 2018, 41(10), 19484-19491            |
| CoSe/NiFe-LDH/NF                                                          | 1 M KOH     | 260@10 mA/cm <sup>2</sup>                                 | 10                 | /           | Chem. Commun. 2016, 52, 908                     |
| NiAlCo-LDH                                                                | 1 M KOH     | 475 @10 mA/cm <sup>2</sup>                                | /                  | 52.4        | Appl Surf Sci. 2016, 370, 445-451               |
| NiCo-LDH/NF                                                               | 1 M KOH     | 162@10 mA/cm <sup>2</sup>                                 | 20                 | 141         | Dalton T. 2017, 14, 8372-8376                   |
| NiFe LDH@NiCoP/NF                                                         | 1 M KOH     | 120@10 mA/cm <sup>2</sup>                                 | 100                | 2           | Adv. Funct. Mater. 2018, 28, 1706847            |
| AlNi-LDH                                                                  | 1 M KOH     | ~200@10 mA/cm <sup>2</sup><br>~290@100 mA/cm <sup>2</sup> | 7                  | 130         | ACS Energy Letter. 2018, 3(4), 9871-9876        |

**Table S4.** Comparison of the electrocatalytic performance of np-NiAl-LDH/NF with recently reported Ni-based electrocatalysts for the OER in alkaline media.

| Catalyst                                                                 | Electrolyte | Overpotential at the corresponding $j$                    | Stability test (h) | Reference                                       |
|--------------------------------------------------------------------------|-------------|-----------------------------------------------------------|--------------------|-------------------------------------------------|
| np-NiAl-LDH/NF                                                           | 1 M KOH     | ~180@10 mA/cm <sup>2</sup><br>~320@100 mA/cm <sup>2</sup> | 60                 | This work                                       |
| Ni@NiFe LDH                                                              | 1 M KOH     | 218@10 mA/cm <sup>2</sup><br>269@100 mA/cm <sup>2</sup>   | 24                 | J Mater Chem A. 2019, 7(38), 21722-21729        |
| CoFe@NiFe/NF                                                             | 1 M KOH     | 190@10 mA/cm <sup>2</sup>                                 | 30                 | Appl Catal B- Environ. 2019, 253, 131-139       |
| NiAl-LDH/MoS <sub>2</sub>                                                | 1 M KOH     | ~310@10 mA/cm <sup>2</sup>                                | 15                 | ACS Energy Lett. 2018, 3, 952-960               |
| NiFeAl LDHs                                                              | 1 M KOH     | 260@10 mA/cm <sup>2</sup>                                 | 10                 | Nano Res. 2018, 11, 4524-4534                   |
| FeNi LDH/NF                                                              | 1 M KOH     | 193@10 mA/cm <sup>2</sup><br>306@50 mA/cm <sup>2</sup>    | 25                 | ACS Sustain Chem Eng. 2019, 7(17), 15073-15079  |
| NiCo <sub>2</sub> O <sub>4</sub> @Ni <sub>x</sub> Co <sub>y</sub> LDH/NF | 1 M KOH     | 115@10 mA/cm <sup>2</sup>                                 | 24                 | ACS Sustain Chem Eng. 2019, 7(5), 4784-4791     |
| Ni <sub>2</sub> Cr <sub>1</sub> LDH/NF                                   | 1 M KOH     | 390@100 mA/cm <sup>2</sup>                                | 20                 | Nanoscale. 2018, 41(10), 19484-19491            |
| AlNi-LDH                                                                 | 1 M KOH     | ~320@100 mA/cm <sup>2</sup>                               | 7                  | ACS Energy Letter. 2018, 3(4), 9871-9876        |
| N-NiAl-LDH                                                               | 1 M KOH     | ~400@100mA/cm <sup>2</sup>                                | 6                  | J Mater Chem A. 2018, 6, 23283-23288            |
| Ni <sub>1-x</sub> Fe <sub>x</sub> LDH/NF                                 | 1 M KOH     | 106@10mA/cm <sup>2</sup>                                  | 36                 | ACS Appl. Mater. Interfaces. 2018, 10(49), 2245 |

**Table S5.** Comparison of the electrocatalytic performance of np-NiAl-LDH/NF with recently reported Ni-based LDH catalysts for overall water splitting in alkaline media.

| Catalyst                                                                 | Electrolyte | Cell voltage (mV)                                         | Stability test (h) | Reference                                       |
|--------------------------------------------------------------------------|-------------|-----------------------------------------------------------|--------------------|-------------------------------------------------|
| np-NiAl-LDH/NF                                                           | 1 M KOH     | 1.5@10 mA/cm <sup>2</sup><br>1.75@100 mA/cm <sup>2</sup>  | 55                 | This work                                       |
| Ni@NiFe LDH                                                              | 1 M KOH     | 1.53@10 mA/cm <sup>2</sup><br>1.78@100 mA/cm <sup>2</sup> | 24                 | J Mater Chem A. 2019, 7(38), 21722-21729        |
| CoFe@NiFe/NF                                                             | 1 M KOH     | 1.59@10 mA/cm <sup>2</sup>                                | 24                 | Appl Catal B- Environ. 2019, 253, 131-139       |
| NiAl-LDH/MoS <sub>2</sub>                                                | 1 M KOH     | 1.5@10 mA/cm <sup>2</sup>                                 | 10                 | ACS Energy Lett. 2018, 3, 952-960               |
| AlNi-LDH                                                                 | 1 M KOH     | 1.58@100 mA/cm <sup>2</sup>                               | 7                  | ACS Energy Letter. 2018, 3(4), 9871-9876        |
| Co <sub>9</sub> S <sub>8</sub> @NiCo LDH/NF                              | 1 M KOH     | 1.6@10 mA/cm <sup>2</sup>                                 | 10                 | Sci Bull. 2019, 60-66                           |
| Ni <sub>3</sub> S <sub>2</sub> @NiV-LDH                                  | 1 M KOH     | 1.53@10 mA/cm <sup>2</sup>                                | 160                | Nanoscale. 2019, 7585-7591                      |
| Fe-Ni LDH/NF                                                             | 1 M KOH     | 1.65@10 mA/cm <sup>2</sup><br>1.73@100 mA/cm <sup>2</sup> | 20                 | ACS Sustain Chem Eng. 2019, 7(17), 15073-15079  |
| NiCo <sub>2</sub> O <sub>4</sub> @Ni <sub>x</sub> Co <sub>y</sub> LDH/NF | 1 M KOH     | ~1.63@10 mA/cm <sup>2</sup>                               | 24                 | ACS Sustain Chem Eng. 2019, 7(5), 4784-4791     |
| Ni <sub>1-x</sub> Fe <sub>x</sub> LDH                                    | 1 M KOH     | 1.59@10 mA/cm <sup>2</sup>                                | 24                 | ACS Appl. Mater. Interfaces. 2018, 10(49), 2245 |
| Ni <sub>2</sub> Cr <sub>1</sub> LDH/NF                                   | 1 M KOH     | 1.55@10 mA/cm <sup>2</sup>                                | 30                 | Nanoscale. 2018, 41(10), 19484-19491            |
